# Supplementary material for: Clinal distribution of human genomic diversity across the Netherlands despite archaeological evidence for genetic discontinuities in Dutch population history
Source: PubMed Central journal article supplement (PMC3707805; doi:10.1186/2041-2223-4-9), 2013-05-20

**Supplementary Table 1.** Schematic overview of geological and cultural periods with corresponding dates and population size estimates for the Dutch territory (<sup>1</sup>: [3], <sup>2</sup>: [2, 14], <sup>3</sup>: [2], <sup>4</sup>: [14], <sup>5</sup>: [11], <sup>6</sup>: [17]).

| Geological period <sup>1</sup> | Cultural period | Date <sup>2</sup>   | Population size x 1,000 |                    |                  |
|--------------------------------|-----------------|---------------------|-------------------------|--------------------|------------------|
| Pleistocene                    | Paleolithic     |                     | ~0 <sup>3</sup>         |                    |                  |
|                                | Late            | 12800 BP - 9700 BP  |                         |                    |                  |
| Holocene                       | Mesolithic      | 9000 - 5300/3400 BC | ~2 <sup>3</sup>         |                    |                  |
|                                | Neolithic       | Early               | 5300 - 4200 BC          | ~10 <sup>3</sup>   |                  |
|                                |                 | Middle              | 4200 - 2900 BC          |                    |                  |
|                                |                 | Late                | 2900 - 2000 BC          |                    |                  |
|                                | Bronze Age      | Early               | 2000 - 1800 BC          | 15-30 <sup>3</sup> |                  |
|                                |                 | Middle              | 1800 - 1100 BC          |                    |                  |
|                                |                 | Late                | 1100 - 800 BC           |                    |                  |
|                                | Iron Age        | Early               | 800 - 500 BC            | 15-30 <sup>3</sup> |                  |
|                                |                 | Middle              | 500 - 250 BC            |                    |                  |
|                                |                 | Late                | 250 - 12 BC             |                    |                  |
|                                | Roman Period    | Early               | 12 BC - 47 AD           | ~150 <sup>3</sup>  |                  |
|                                |                 | Middle              | 47 - 260 AD             |                    |                  |
|                                |                 | Late                | 260 - 450 AD            |                    |                  |
|                                | Medievals       | Early               | Merovingian             | 450 - 750 AD       | ~40 <sup>4</sup> |
|                                |                 |                     | Carolingian             | 750 - 950 AD       |                  |
|                                |                 | Late                | 950 - 1500 AD           |                    |                  |
| Modern period                  |                 | 1500 AD             | ~2,000 <sup>5</sup>     |                    |                  |
|                                |                 | 1800 AD             | ~2,500 <sup>5</sup>     |                    |                  |
|                                |                 | 1900 AD             | ~5,000 <sup>6</sup>     |                    |                  |
|                                |                 | 1950 AD             | ~10,000 <sup>6</sup>    |                    |                  |
|                                |                 | 2011 AD             | ~16,000 <sup>6</sup>    |                    |                  |

**Supplementary Figure 1.** Estimated population size on Dutch territory over times, based on Supplementary Table 1.

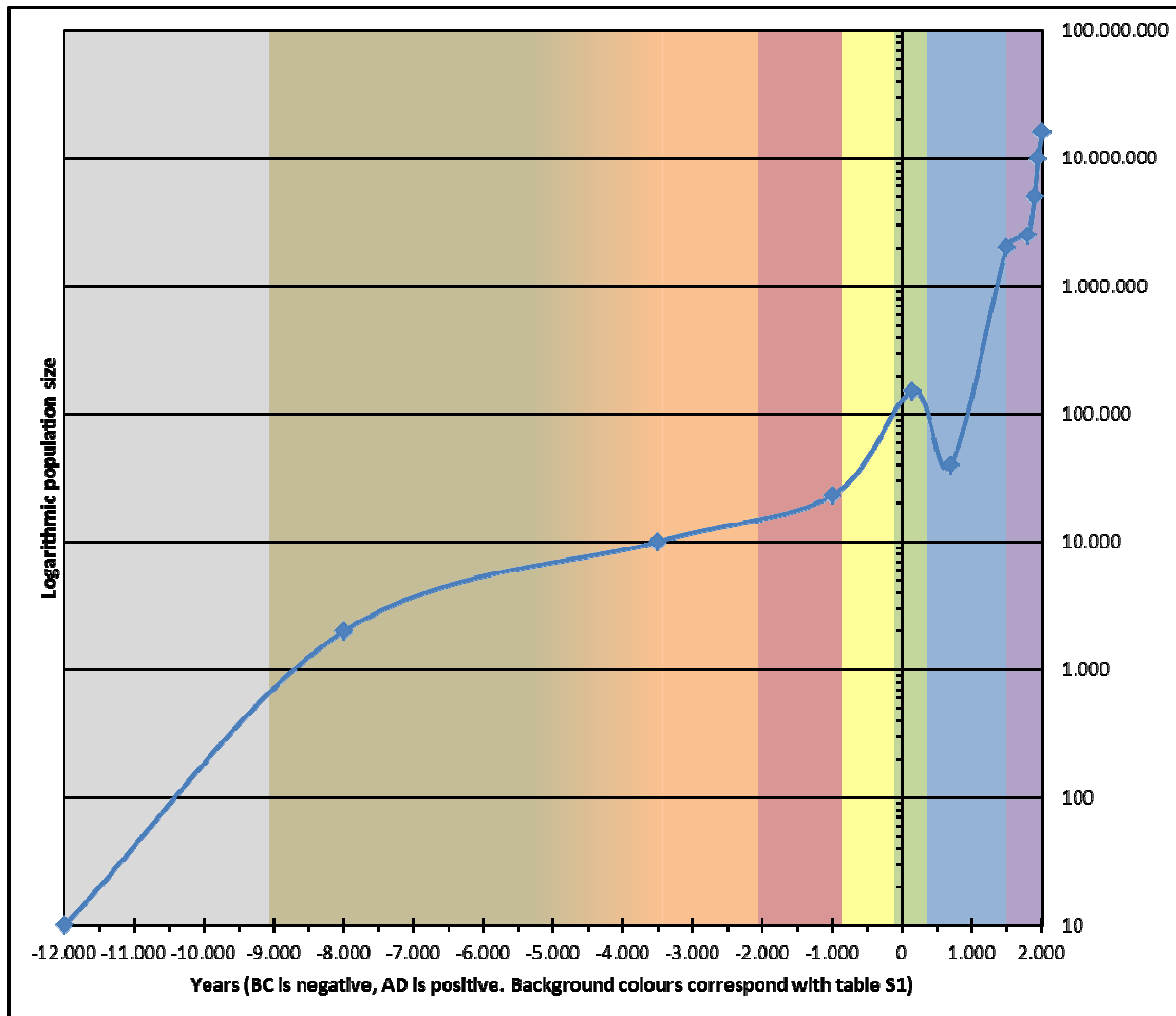

**Supplementary Figure 2.** A) Classical MDS on genome-wide autosomal data performed with 969 individuals of 54 Dutch subpopulations after data cleaning. B) Mclust analysis performed in the first two dimensions. Mclust detects three main clusters.

**A**

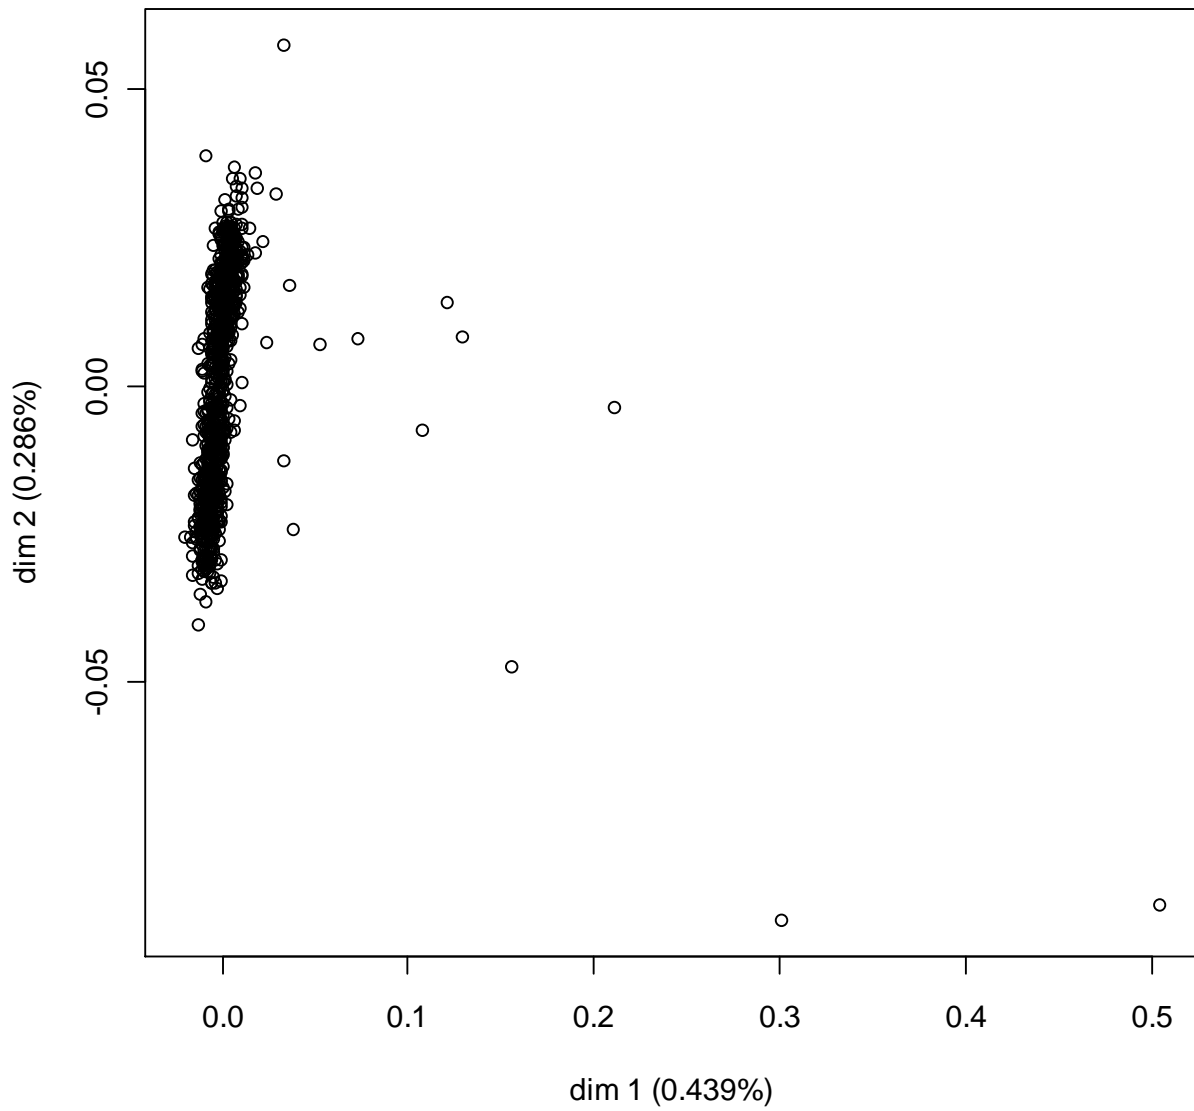

**B**

### Classification

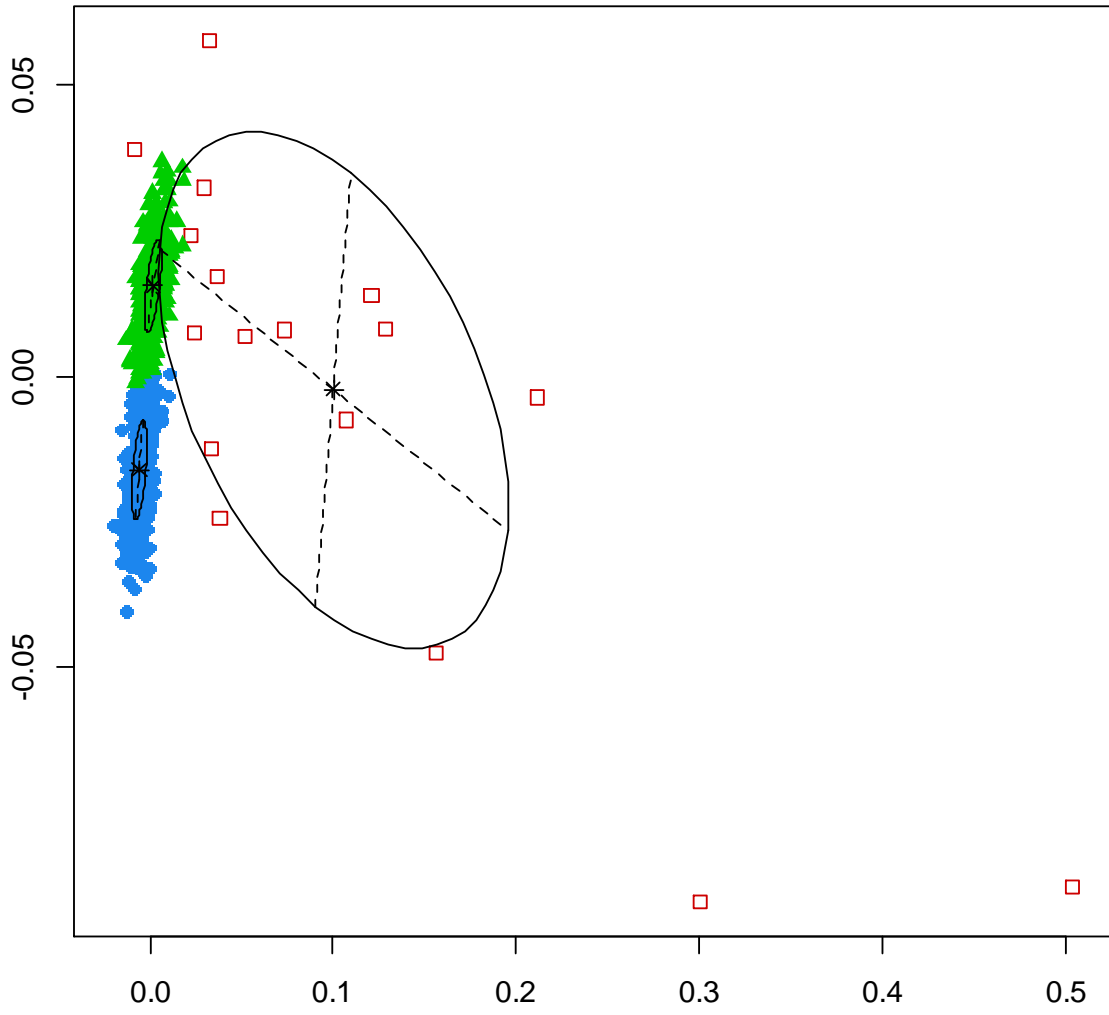

Supplement: 2041-2223-4-9-S1.pdf [file 2041-2223-4-9-S1.pdf]
